# Supplementary material for: Fusion protein strategies for cryo-EM study of G protein-coupled receptors
Source: PubMed Central journal article supplement (PMC9334595; doi:10.1038/s41467-022-32125-2), 2022-07-28
Supplement: 41467_2022_32125_MOESM1_ESM.pdf [file 41467_2022_32125_MOESM1_ESM.pdf]

## Supplementary Information

### **Fusion protein strategies for cryo-EM study of G protein-coupled receptors**

Kaihua Zhang<sup>1</sup>, Hao Wu<sup>1#</sup>, Nicholas Hoppe<sup>2#</sup>, Aashish Manglik<sup>2,3\*</sup> and Yifan Cheng<sup>1,4\*</sup>

# These authors contributed equally to this work.

\* Corresponding author. Email: [Aashish.Manglik@ucsf.edu](mailto:Aashish.Manglik@ucsf.edu); [Yifan.Cheng@ucsf.edu](mailto:Yifan.Cheng@ucsf.edu)

#### **This file includes:**

Supplementary Figures 1–10

Supplementary Table 1

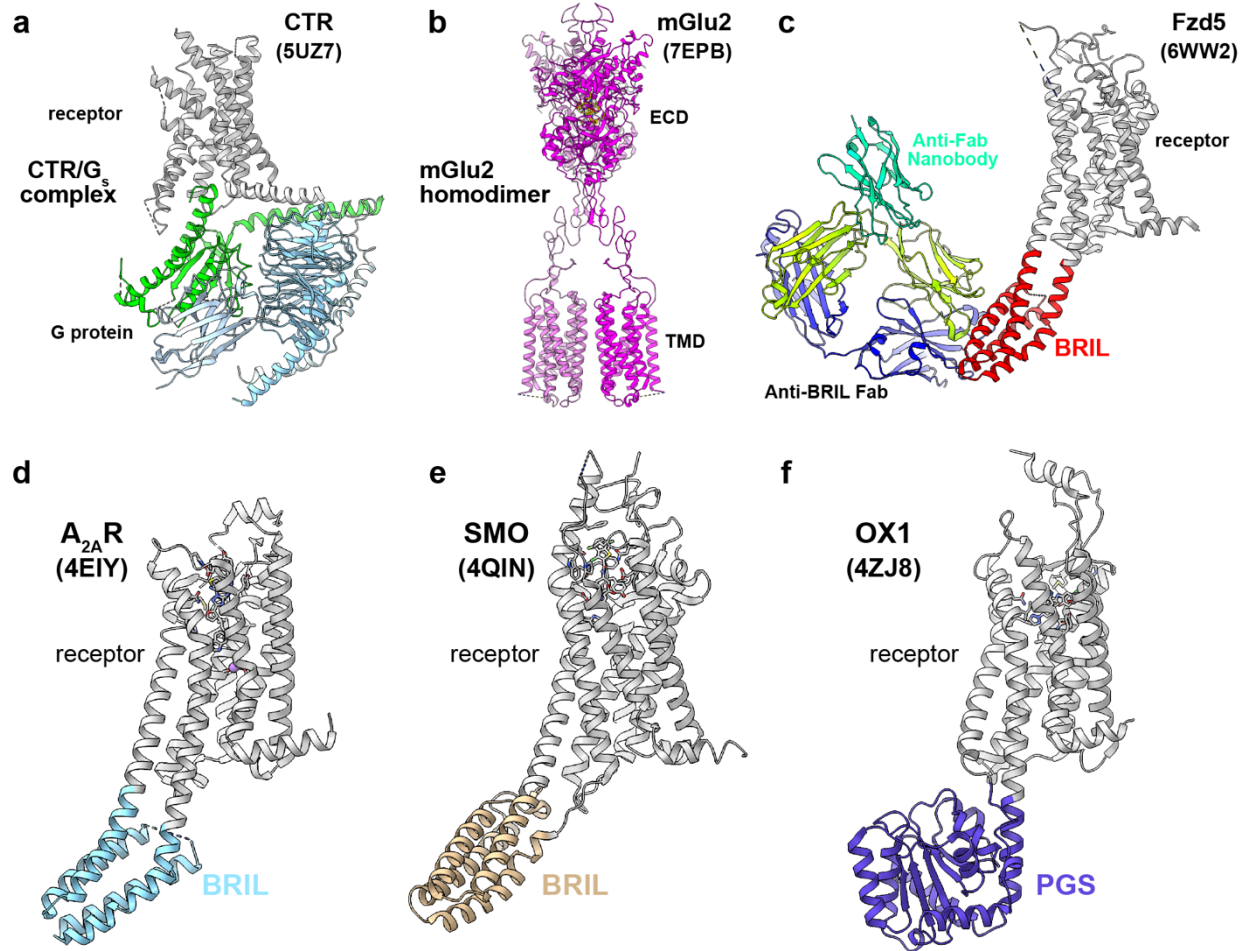

**Supplementary Figure 1 | Strategies for structural determination of GPCRs by single particle cryo-EM**

**a**, Calcitonin receptor (CTR)-G<sub>s</sub> complex<sup>38</sup> is an example of GPCR/G protein complexes determined by single particle cryo-EM. **b**, Structure of metabotropic glutamate receptors<sup>9</sup> as an example of GPCR dimer determined by single particle cryo-EM. **c**, The cryo-EM structure of hFzd5-Bril in complex with anti-BRIL Fab and anti-Fab nanobody<sup>13</sup>. **d**, **e**, and **f**, Examples of fusion protein BRIL and PGS inserted into A<sub>2A</sub>R-BRIL<sup>24</sup> (**d**), SMO<sup>19</sup> (**e**) and OX1<sup>29</sup> (**f**). These constructs facilitated structure determination by X-ray crystallography. In these examples, BRIL is inserted to A<sub>2A</sub>R with two extended helices (**d**), to SMO with a single extended helix (**e**). PGS is inserted with a single extended helix (**f**).

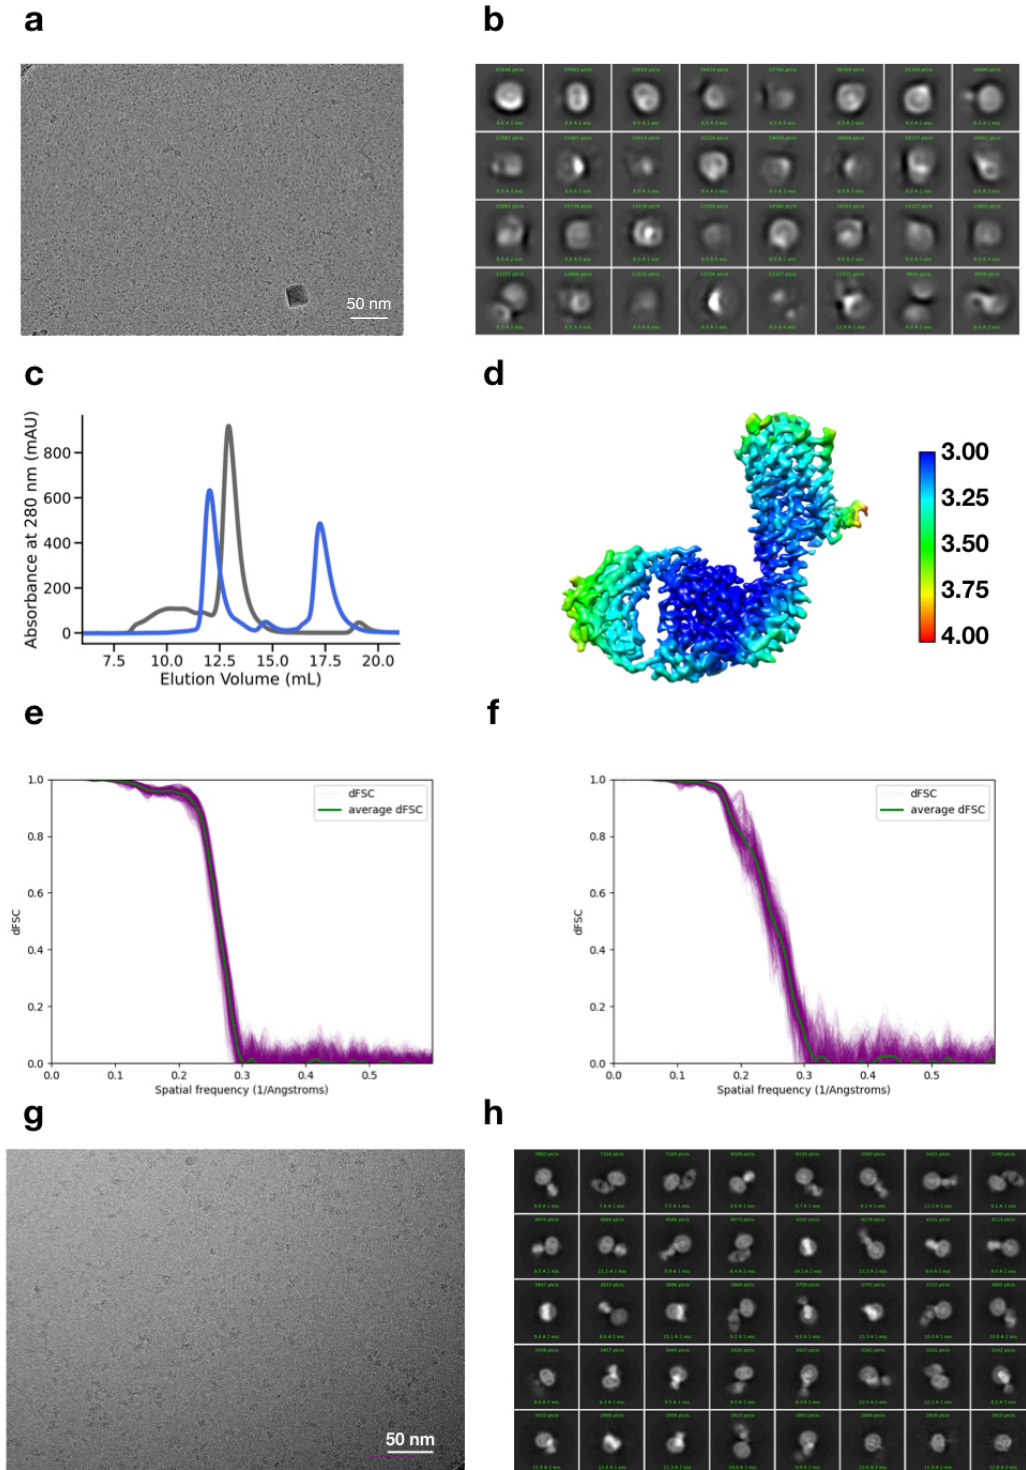

**Supplementary Figure 2 | Single particle analysis on A<sub>2A</sub>R-BRIL**

**a**, Representative raw image of the A<sub>2A</sub>R-BRIL sample. **b**, 2D average of the A<sub>2A</sub>R-BRIL sample. **c**, SEC curve of purified A<sub>2A</sub>R-BRIL (gray) and A<sub>2A</sub>R-BRIL/Fab complex (blue). **d**, Density map colored by local resolution. **e** and **f**, Directional Fourier shell correlation (dFSC) curves of the intact complex and the TM region, respectively. **g**, Representative raw image of the A<sub>2A</sub>R-BRIL/Fab complex. **h**, 2D average result of the A<sub>2A</sub>R-BRIL/Fab complex.

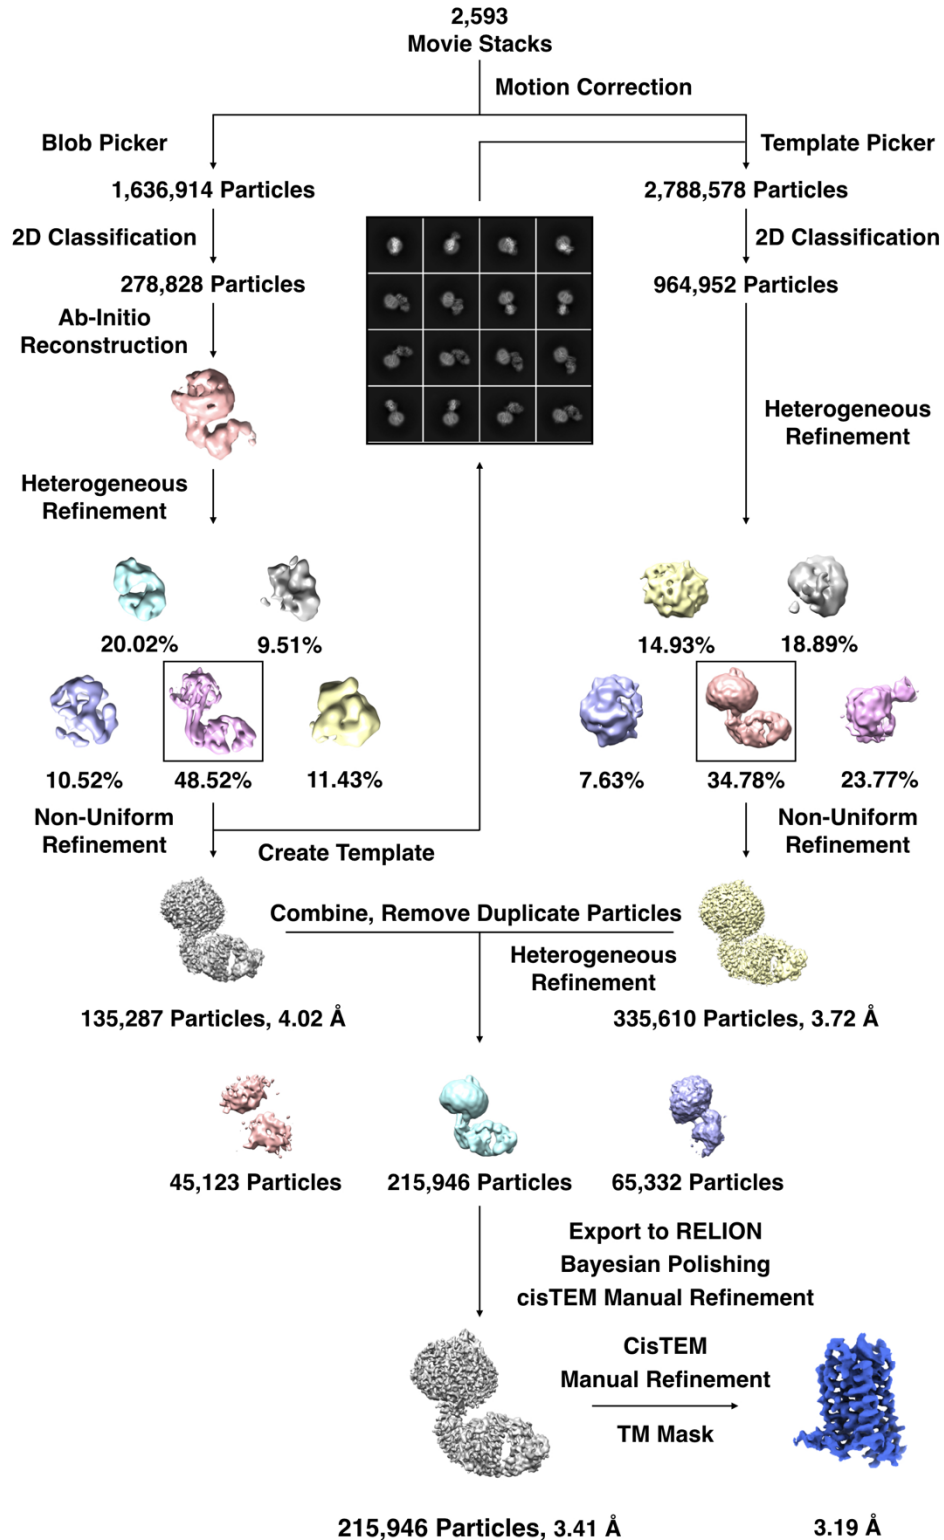

**Supplementary Figure 3** | Flow chart of cryo-EM data analysis on A<sub>2A</sub>R-BRIL/Fab  
Flow chart illustrates data processing procedure in determining cryo-EM structure of A<sub>2A</sub>R-BRIL/Fab complex.

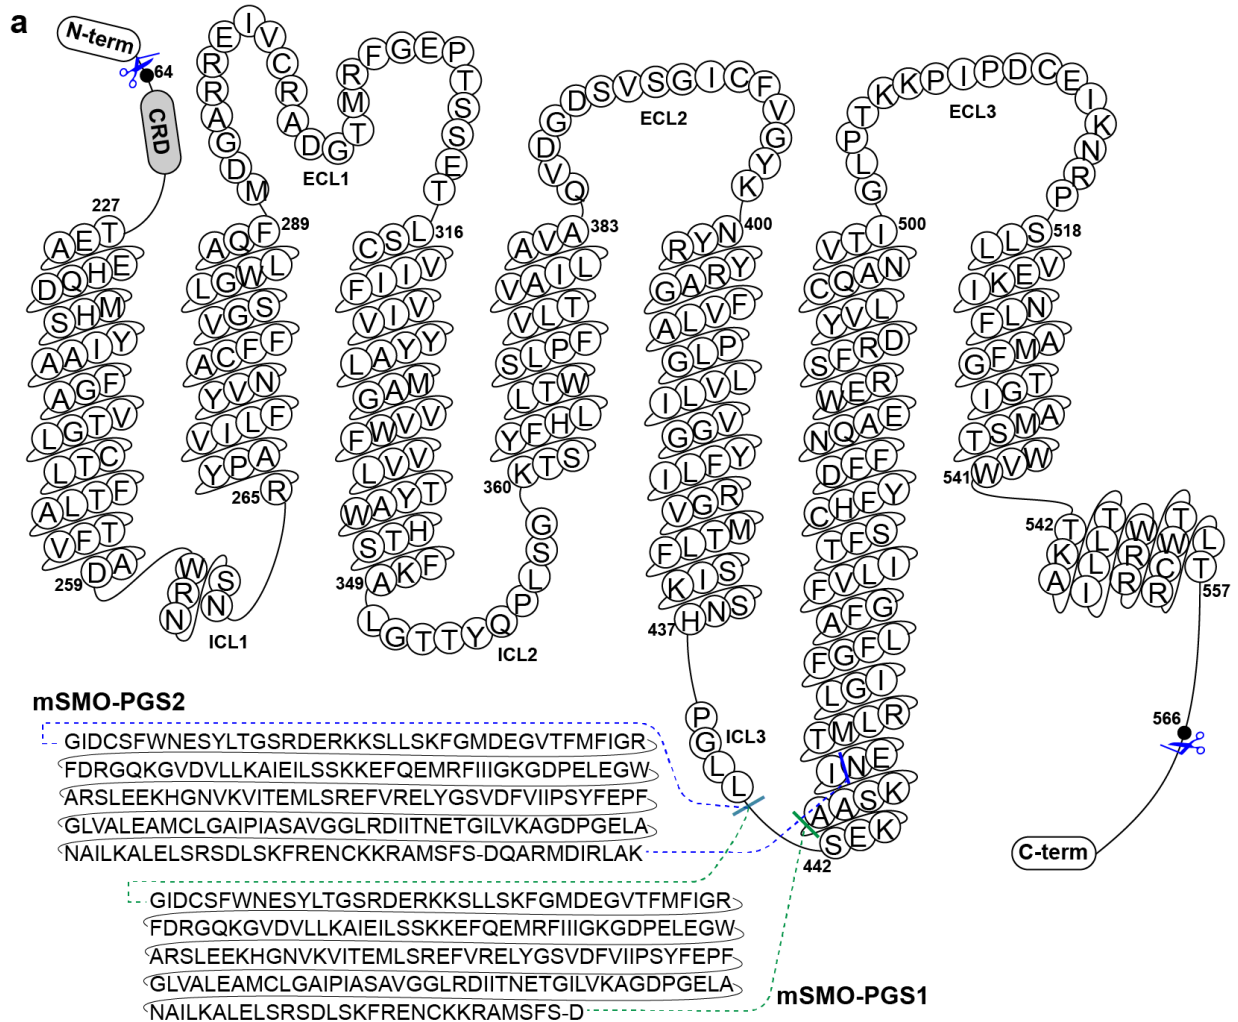

**b**

|                                   | TM5                                                    | ICL3  | TM6                         |
|-----------------------------------|--------------------------------------------------------|-------|-----------------------------|
| 4O9R/4QIM/4QIN(human)             | 414 VGGYFLIRGVMTLFSIKSNH                               | ----- | AASKINETMLRLGIFGFLAFGFV 463 |
| 4JKV/4N4W/6OT0/6XBM(K/J/L)(human) | 414 VGGYFLIRGVMTLFSIKSNHPGLLSEKAASKINETMLRLGIFGFLAFGFV |       | 463                         |
| 5L7D/5L7I(human)                  | 414 VGGYFLIRGVMTLFS                                    | ----- | SKINETMLRLGIFGFLAFGFV 463   |
| 5V56/5V57(human)                  | 414 VGGYFLIRGVMTLFSIKSNH                               | ----- | KINETMLRLGIFGFLAFGFV 463    |
| 6O3C(mouse)                       | 418 VGGYFLIRGVMTLFSIKSNHPGLLSEKAASKINETMLRLGIFGFLAFGFV |       | 467                         |
| 6D32/6D35(Xenopus)                | 387 GGGYFLIRGVMTLFS                                    | ----- | SKINETMLRLGIFGFLAFGFV 436   |
| This study_mSMO-PGS1              | 418 VGGYFLIRGVMTLFSIKSNHPGLL                           | ---   | AASKINETMLRLGIFGFLAFGFV 467 |
| This study_mSMO-PGS2              | 418 VGGYFLIRGVMTLFSIKSNHPGLL                           | ----- | NETMLRLGIFGFLAFGFV 467      |

### Supplementary Figure 4 | Construct design of SMO-PGS

**a**, Detailed illustration of two constructs designed for SMO-PGS. **b**, Sequence alignment concerning the modifications of ICL3 in this study and other publications. The construct of mSMO-BRIL in this study has the same insertion of BRIL into ICL3 as used in the crystallization (PDB ID: 4QIN).

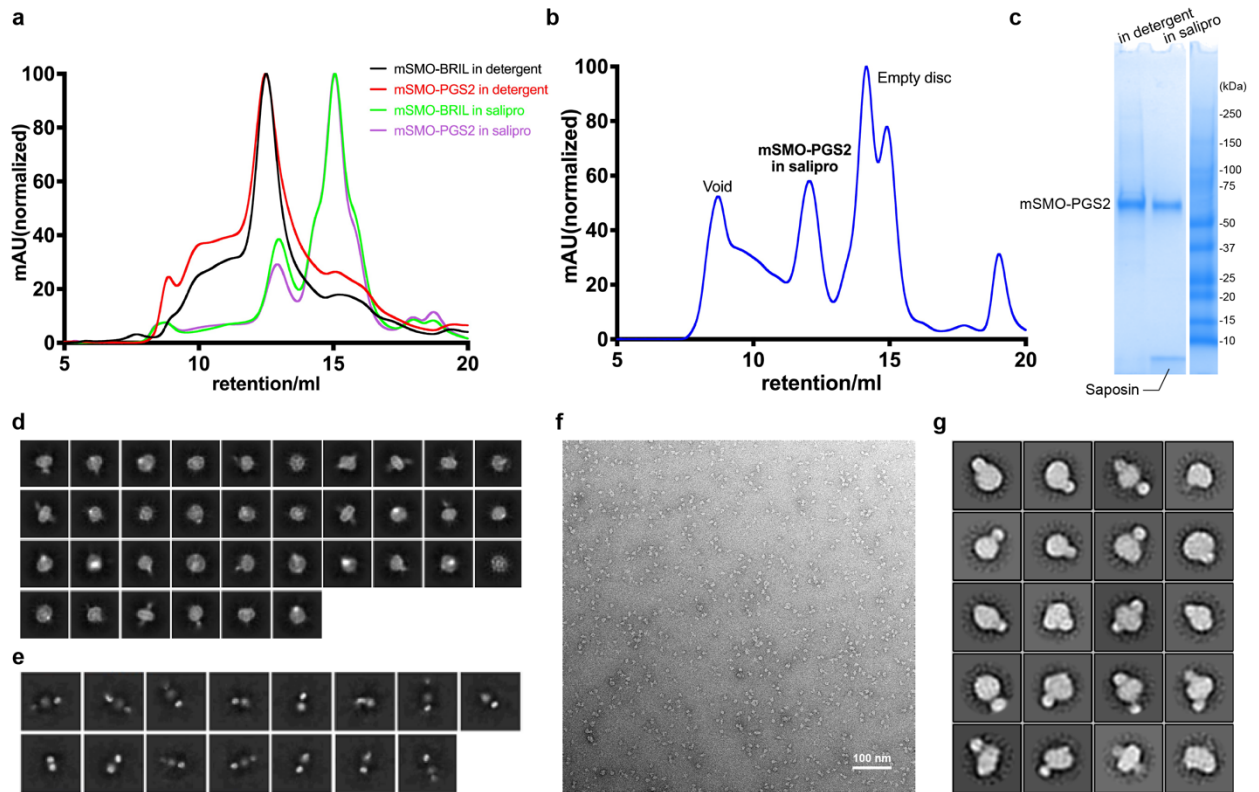

**Supplementary Figure 5 | Assessment of SMO-PGS/BRIL preparation**

**a**, Screening results of the purified mSMO-BRIL and mSMO-PGS2 in detergent or salipro by gel filtration. The SEC profile was prepared by the software Graphpad Prism. **b**, Gel filtration result of mSMO-PGS2 in salipro right before cryo grids preparation. **c**, SDS-PAGE gel image stained by Coomassie blue. **d** and **e**, 2D averages of mSMO-BRIL without (**d**) or with (**e**) anti-BRIL fab through cryo-EM. The box size is 214 Å for mSMO-BRIL and 412 Å for mSMO-BRIL/anti-BRIL Fab. **f** and **g**, One representative raw micrograph (**f**) and 2D averages (**g**) of mSMO-PGS2 through negative-stain EM.

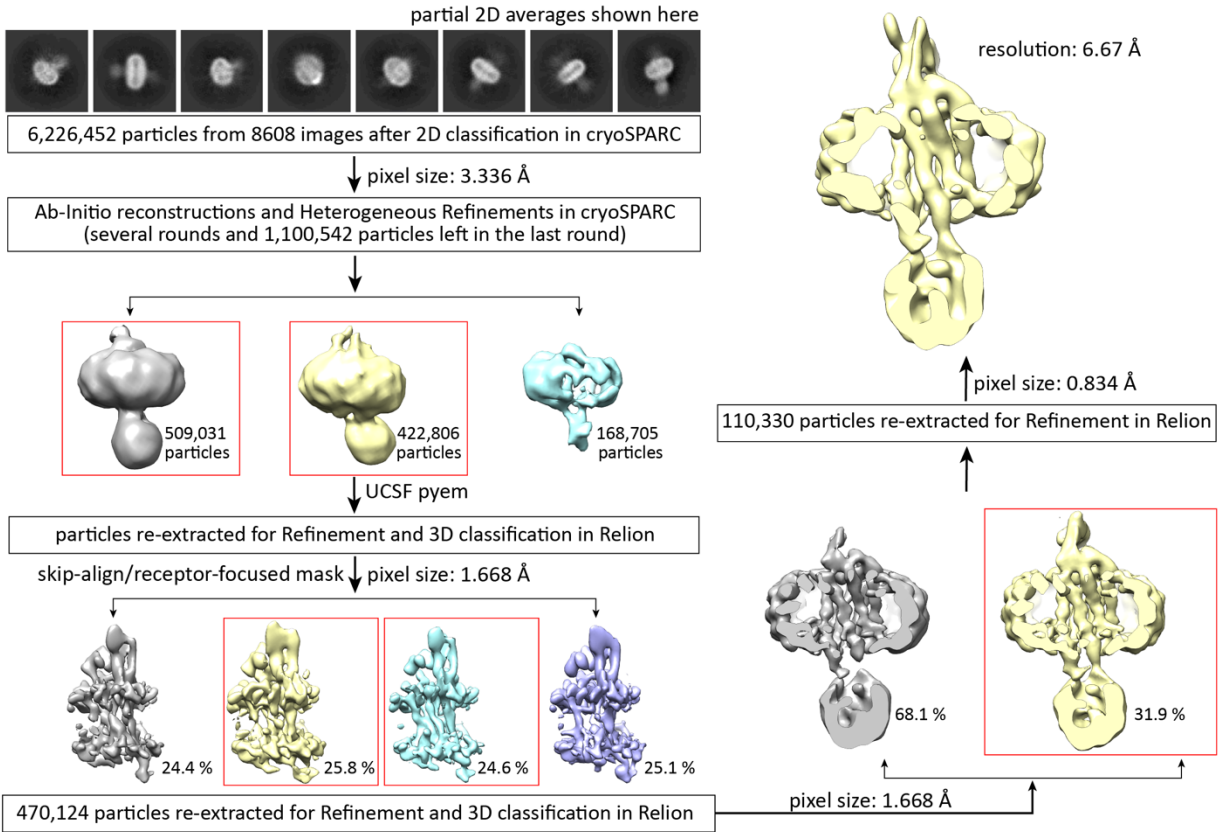

**Supplementary Figure 6** | Workflow for the data processing of the construct mSMO-PGS1  
Flow chart illustrates data processing procedure in determining cryo-EM structure of mSMO-PGS1.

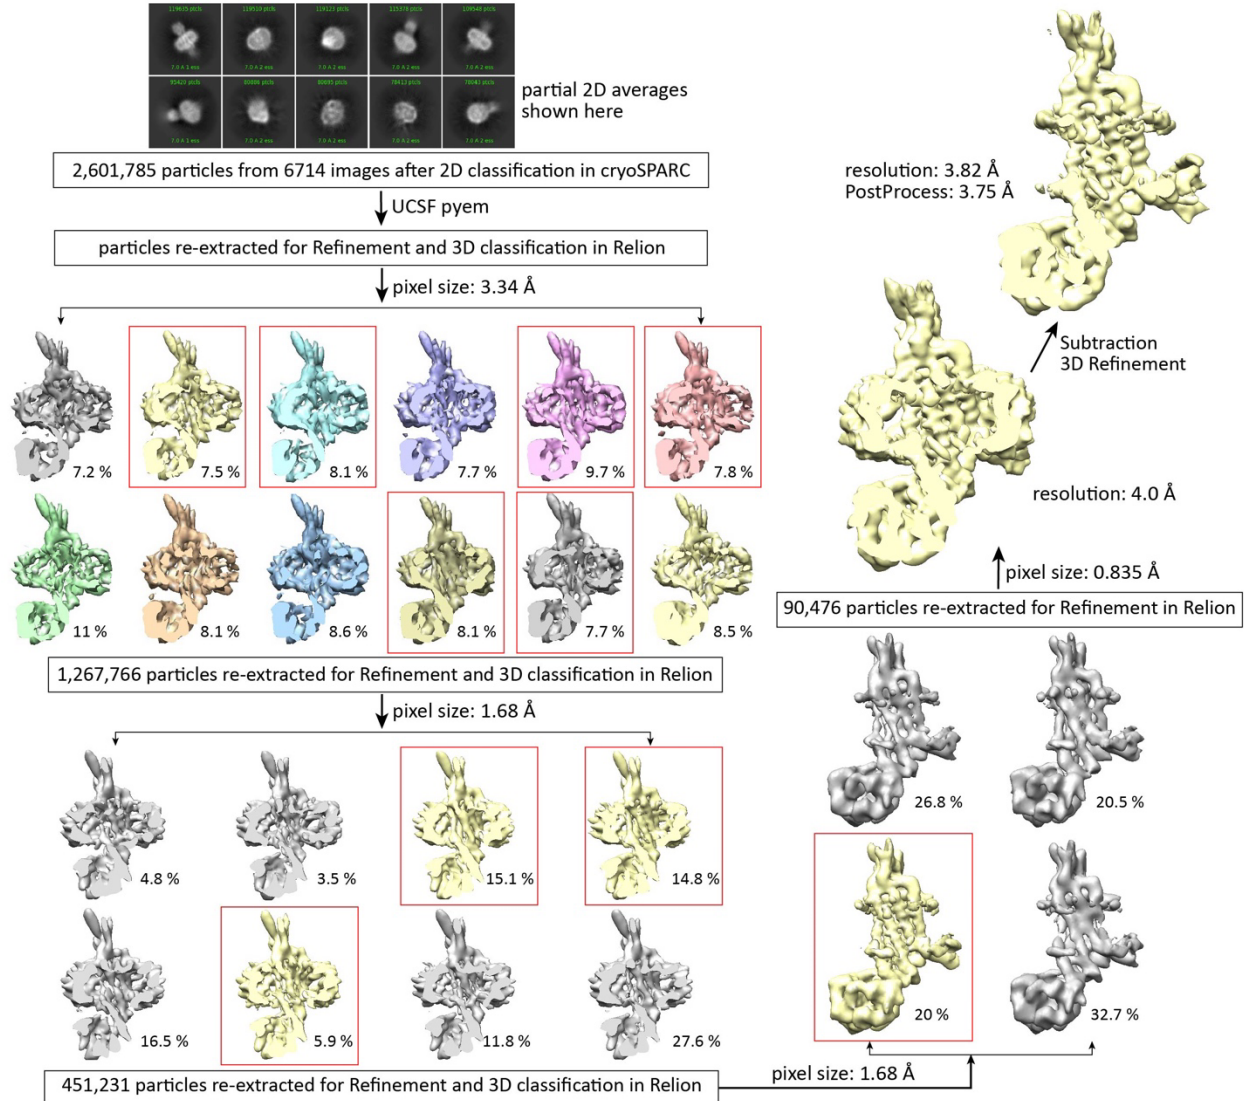

**Supplementary Figure 7 |** Workflow for the data processing of the construct mSMO-PGS2  
Flow chart illustrates data processing procedure in determining cryo-EM structure of mSMO-PGS2.



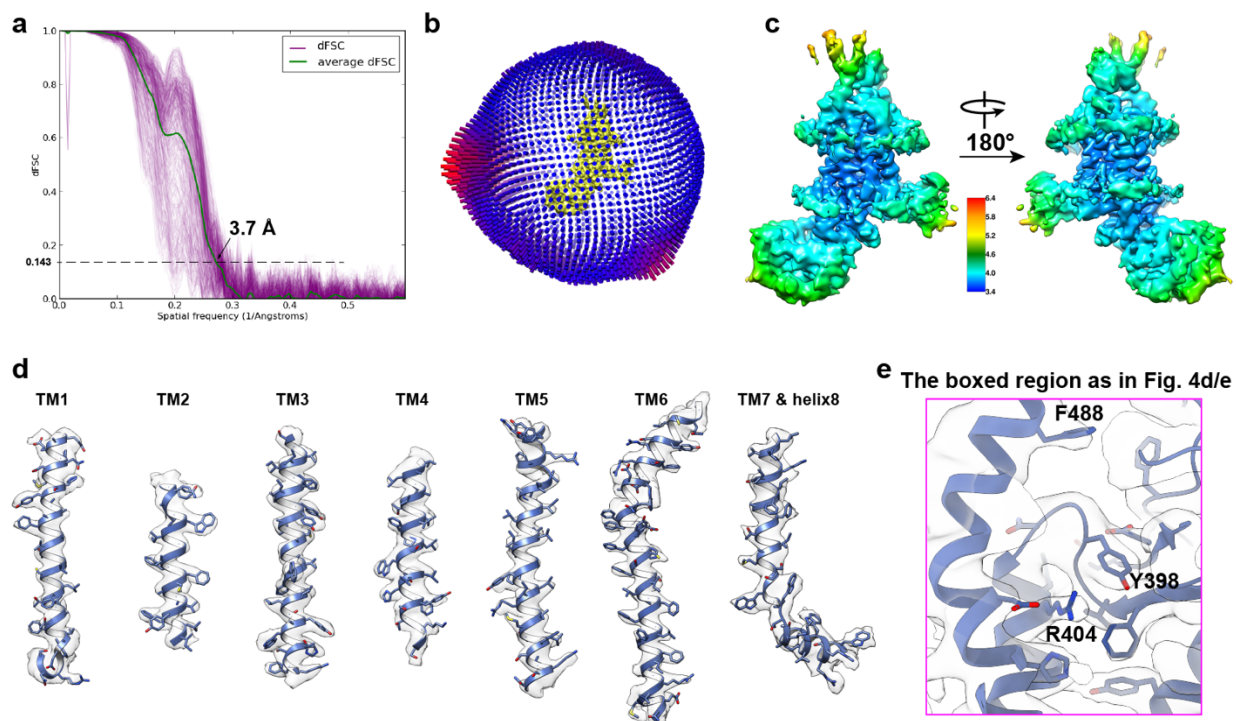

### Supplementary Figure 8 | Cryo-EM structure of mSMO-PGS2 at high resolution

**a**, Directional Fourier shell correlation (dFSC) curves. **b**, Histogram representation of the Euler angle distribution from the final particles used in the reconstruction. **c**, EM map colored using local resolution (Å) information from highest resolution (dark blue) to lowest resolution (red). **d**, Density and atomic model for the transmembrane helices. **e**, The enlarged view of the boxed region as presented in the Figure 4d/e to highlight the modeling of mSMO-PGS2 into the density map. Three residues are labeled including Y398, R404 and F488.

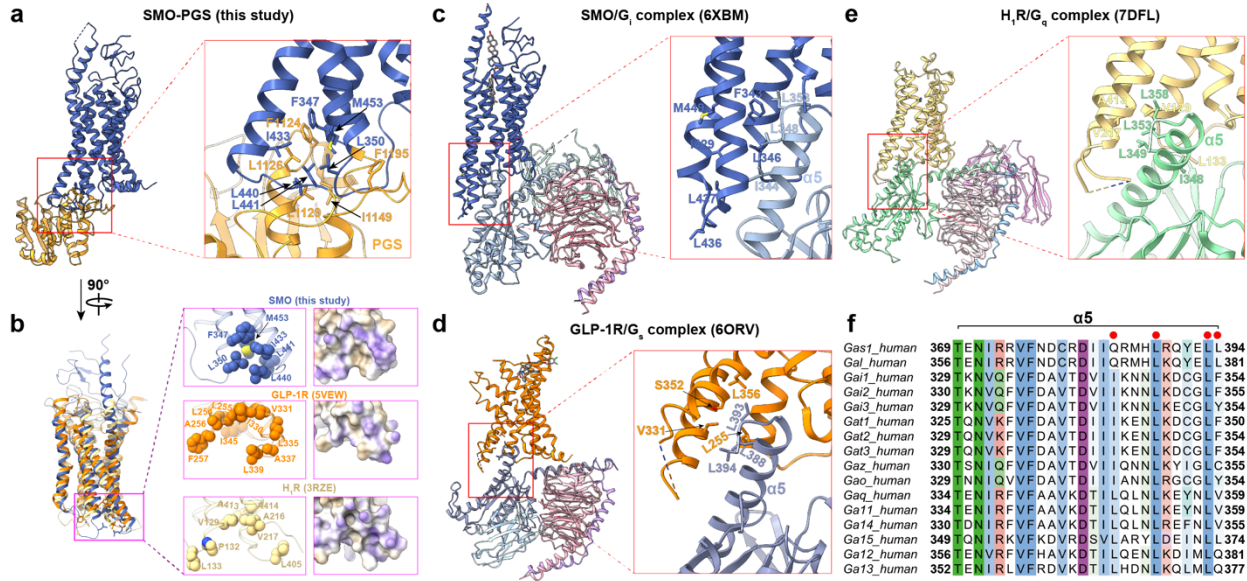

**Supplementary Figure 9 | Hydrophobic interactions present in SMO-PGS and GPCR/G protein complexes**

**a**, The hydrophobic interactions between SMO and PGS. **b**, Structural overlay of SMO (this study) with GLP-1R (PDB ID: 5VEW) and H1R (PDB ID: 3RZE). The enlarged views show the key hydrophobic residues, which are labeled and displayed as sphere, and the hydrophobicity surface. **c**, The hydrophobic interactions of human SMO/G<sub>i</sub> protein complex. **d**, The hydrophobic interactions of GLP-1R/G<sub>s</sub> protein complex. **e**, The hydrophobic interactions of H<sub>1</sub>R-G<sub>q</sub> protein complex. **f**, Sequence alignment of  $\alpha 5$  in G protein family.

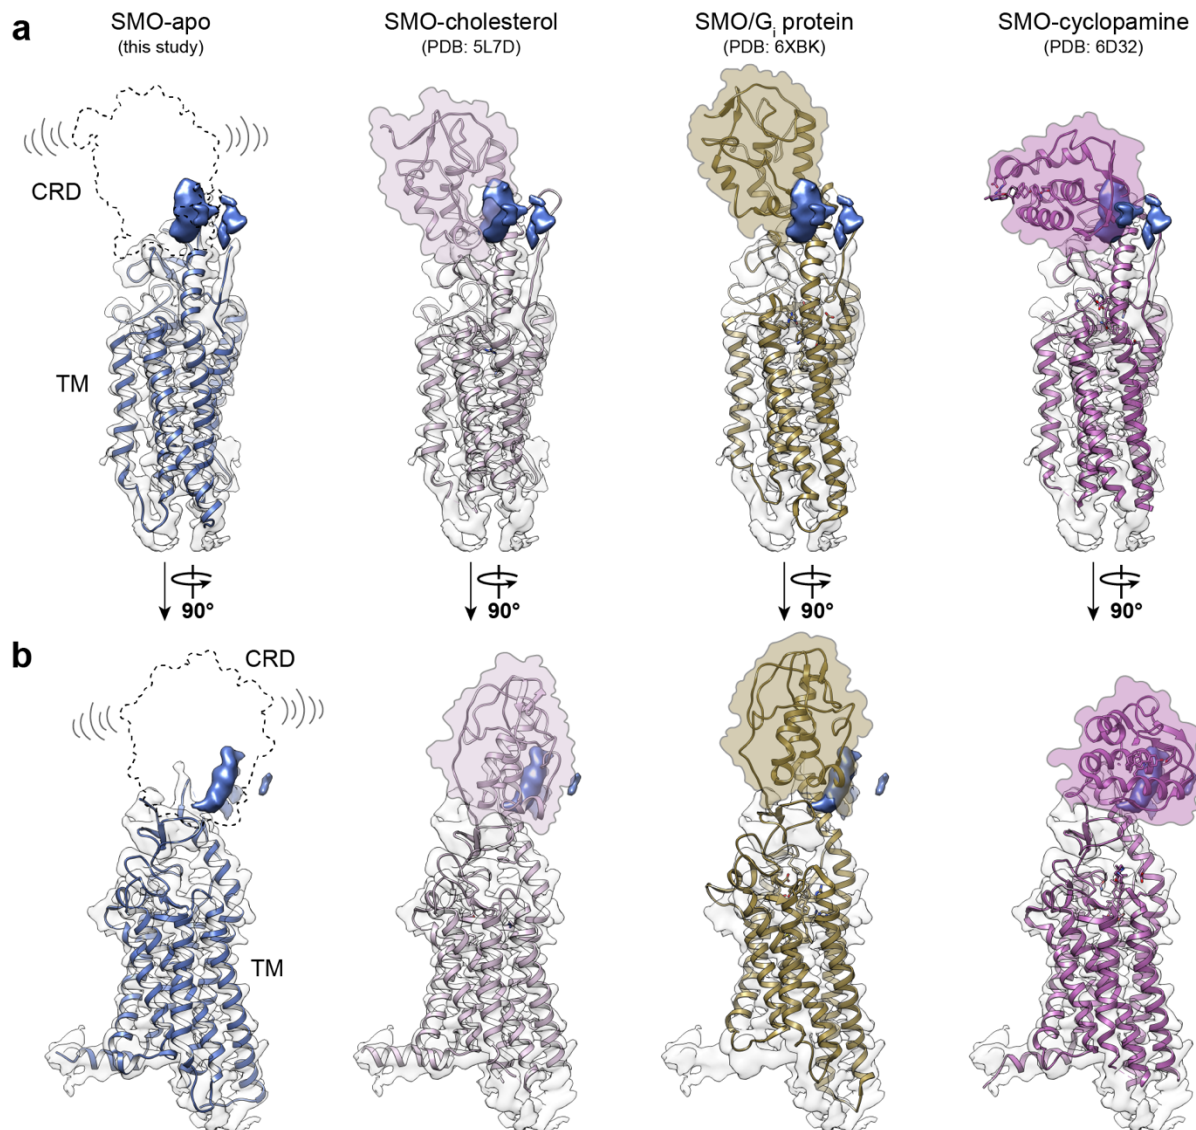

**Supplementary Figure 10** | Docking of representative atomic models into mSMO-PGS2 density map

**a** and **b**, From left to right, docking of de novo built atomic model, SMO-cholesterol, SMO/*G<sub>i</sub>* protein, and SMO-cyclopamine models.

**Supplementary Table 1** | Cryo-EM data collection, image processing, and validation statistics

|                                                       | <b>mSMO-PGS1<br/>(EMD-27063)<br/>no model</b> | <b>mSMO-PGS2<br/>(EMD-27062)<br/>(PDB-8CXO)</b> | <b>A<sub>2</sub>A-BRIL/Fab<br/>(EMD-25648)<br/>(PDB-7T32)</b> |
|-------------------------------------------------------|-----------------------------------------------|-------------------------------------------------|---------------------------------------------------------------|
| <b>Data Collection/Processing</b>                     |                                               |                                                 |                                                               |
| Microscope                                            | Titan Krios                                   | Titan Krios                                     | Titan Krios                                                   |
| Detector                                              | Gatan K3                                      | Gatan K3                                        | Gatan K3                                                      |
| Voltage (kV)                                          | 300                                           | 300                                             | 300                                                           |
| Magnification                                         | 105,000                                       | 105,000                                         | 105,000                                                       |
| Defocus Range (μm)                                    | -0.5 to -3.0                                  | -0.5 to -3.0                                    | -1.0 to -2.0                                                  |
| Pixel Size (Å)                                        | 0.834                                         | 0.835                                           | 0.835                                                         |
| Total Electron Dose (e <sup>-</sup> /Å <sup>2</sup> ) | 66                                            | 68.4                                            | 67                                                            |
| Exposure Time (s)                                     | 6                                             | 6                                               | 6                                                             |
| Number of Images                                      | 8608                                          | 6714                                            | 2593                                                          |
| Number of Frames/Image                                | 120                                           | 120                                             | 117                                                           |
| Symmetry imposed                                      | C1                                            | C1                                              | C1                                                            |
| Initial Particle Number                               | 6,226,452                                     | 2,601,785                                       | 2,788,578                                                     |
| Final Particle Number                                 | 110,330                                       | 90,476                                          | 215,946                                                       |
| Map resolution (Å)                                    | 6.7                                           | 3.7                                             | 3.4                                                           |
| FSC threshold                                         | 0.143                                         | 0.143                                           | 0.143                                                         |
| <b>Refinement</b>                                     |                                               |                                                 |                                                               |
| Initial model used (PDB code)                         | n/a                                           | 6O3C                                            | 4E1Y                                                          |
| Model resolution (Å)                                  | n/a                                           | 4.2                                             | 4.1                                                           |
| FSC threshold                                         | n/a                                           | 0.5                                             | 0.5                                                           |
| Map sharpening B factor (Å <sup>2</sup> )             | n/a                                           | -165                                            | -100                                                          |
| Model composition                                     |                                               |                                                 |                                                               |
| Non-hydrogen atoms                                    | n/a                                           | 4392                                            | 2981                                                          |
| Protein residues                                      | n/a                                           | 551                                             | 390                                                           |
| water                                                 | n/a                                           | 0                                               | 0                                                             |
| Ligands                                               | n/a                                           | 1                                               | 1                                                             |
| B factors (Å <sup>2</sup> )                           |                                               |                                                 |                                                               |
| Protein                                               | n/a                                           | 163                                             | 126.92                                                        |
| Ligand                                                | n/a                                           | 0                                               | 127.55                                                        |
| water                                                 | n/a                                           | n/a                                             | n/a                                                           |
| R.m.s. deviations                                     |                                               |                                                 |                                                               |
| Bond lengths (Å)                                      | n/a                                           | 0.004                                           | 0.0006                                                        |
| Bond angles (°)                                       | n/a                                           | 1.017                                           | 1.287                                                         |
| Validation                                            |                                               |                                                 |                                                               |
| MolProbity score                                      | n/a                                           | 1.09                                            | 1.66                                                          |
| Clashscore                                            | n/a                                           | 1.6                                             | 3.87                                                          |
| Poor rotamers (%)                                     | n/a                                           | 0                                               | 0                                                             |
| Ramachandran plot                                     |                                               |                                                 |                                                               |
| Favored (%)                                           | n/a                                           | 96.89                                           | 94.01                                                         |
| Allowed (%)                                           | n/a                                           | 2.74                                            | 5.21                                                          |
| Disallowed (%)                                        | n/a                                           | 0.37                                            | 0.78                                                          |
